# Supplementary material for: Nutraceutical Characterization of Anthocyanin-Rich Fruits Produced by “Sun Black” Tomato Line
Source: PubMed Central journal article supplement (PMC6722425; doi:10.3389/fnut.2019.00133), 2019-08-28
Supplement: Table_1.pdf [file Table_1.pdf]

**TABLE S1** | Content of gentisic acid, chlorogenic acid, rutin and total flavonols in wild type (WT) and Sun Black (SB) tomato at different stages of ripening, mature green (MG), breaker (BR) and red ripe (RR).

| Sample         | Gentisic acid                 |                               | Chlorogenic acid              |                               | Rutin                           |                               | Total flavonols               |                               |
|----------------|-------------------------------|-------------------------------|-------------------------------|-------------------------------|---------------------------------|-------------------------------|-------------------------------|-------------------------------|
|                | mg/g DW                       | mg/100 g FW                   | mg/g DW                       | mg/100 g FW                   | mg/g DW                         | mg/100 g FW                   | mg/g DW                       | mg/100 g FW                   |
| <b>WT - MG</b> | 0.021 ±<br>0.003 <sup>f</sup> | 0.149 ±<br>0.020 <sup>e</sup> | 0.309 ±<br>0.013 <sup>d</sup> | 2.221 ±<br>0.094 <sup>c</sup> | 0.442 ±<br>0.054 <sup>e</sup>   | 3.180 ±<br>0.392 <sup>b</sup> | 0.583 ±<br>0.052 <sup>b</sup> | 4.200 ±<br>0.371 <sup>c</sup> |
| <b>WT - BR</b> | 0.229 ±<br>0.014 <sup>d</sup> | 1.445 ±<br>0.088 <sup>c</sup> | 0.249 ±<br>0.012 <sup>e</sup> | 1.571 ±<br>0.075 <sup>d</sup> | 0.603 ±<br>0.003 <sup>bd</sup>  | 3.800 ±<br>0.019 <sup>b</sup> | 0.839 ±<br>0.019 <sup>b</sup> | 5.284 ±<br>0.121 <sup>b</sup> |
| <b>WT - RR</b> | 0.301 ±<br>0.012 <sup>c</sup> | 2.314 ±<br>0.092 <sup>b</sup> | 0.043 ±<br>0.002 <sup>f</sup> | 0.328 ±<br>0.015 <sup>e</sup> | 0.602 ±<br>0.023 <sup>b</sup>   | 4.632 ±<br>0.176 <sup>a</sup> | 0.811 ±<br>0.038 <sup>a</sup> | 6.247 ±<br>0.296 <sup>a</sup> |
| <b>SB - MG</b> | 0.099 ±<br>0.005 <sup>e</sup> | 0.652 ±<br>0.032 <sup>d</sup> | 1.314 ±<br>0.041 <sup>a</sup> | 8.674 ±<br>0.272 <sup>a</sup> | 0.694 ±<br>0.069 <sup>b</sup>   | 4.581 ±<br>0.458 <sup>a</sup> | 1.152 ±<br>0.069 <sup>a</sup> | 7.603 ±<br>0.458 <sup>a</sup> |
| <b>SB - BR</b> | 0.346 ±<br>0.008 <sup>b</sup> | 2.251 ±<br>0.051 <sup>b</sup> | 0.546 ±<br>0.009 <sup>c</sup> | 3.551 ±<br>0.059 <sup>b</sup> | 0.542 ±<br>0.001 <sup>cde</sup> | 3.523 ±<br>0.004 <sup>b</sup> | 0.803 ±<br>0.001 <sup>b</sup> | 5.218 ±<br>0.004 <sup>a</sup> |
| <b>SB - RR</b> | 0.467 ±<br>0.018 <sup>a</sup> | 2.846 ±<br>0.112 <sup>a</sup> | 0.613 ±<br>0.018 <sup>b</sup> | 3.740 ±<br>0.111 <sup>b</sup> | 0.818 ±<br>0.005 <sup>a</sup>   | 4.990 ±<br>0.030 <sup>a</sup> | 1.119 ±<br>0.005 <sup>a</sup> | 6.825 ±<br>0.030 <sup>a</sup> |

The same letters in the same column indicate that mean values (n=3) are not significantly different ( $p < 0.05$ ).
